# Supplementary material for: Aerosol and dynamical contributions to cloud droplet formation in Arctic low-level clouds
Source: Copernicus journal article supplement (doi:10.5194/acp-23-13941-2023), 2023-11-08
Supplement: Supplementary file 1 [file acp-23-13941-2023-supplement.pdf]

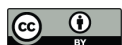

*Supplement of*

## **Aerosol and dynamical contributions to cloud droplet formation in Arctic low-level clouds**

**Ghislain Motos et al.**

*Correspondence to:* Ghislain Motos ([ghislain.motos@epfl.ch](mailto:ghislain.motos@epfl.ch)) and Athanasios Nenes ([athanasios.nenes@epfl.ch](mailto:athanasios.nenes@epfl.ch))

The copyright of individual parts of the supplement might differ from the article licence.

1 Supplement

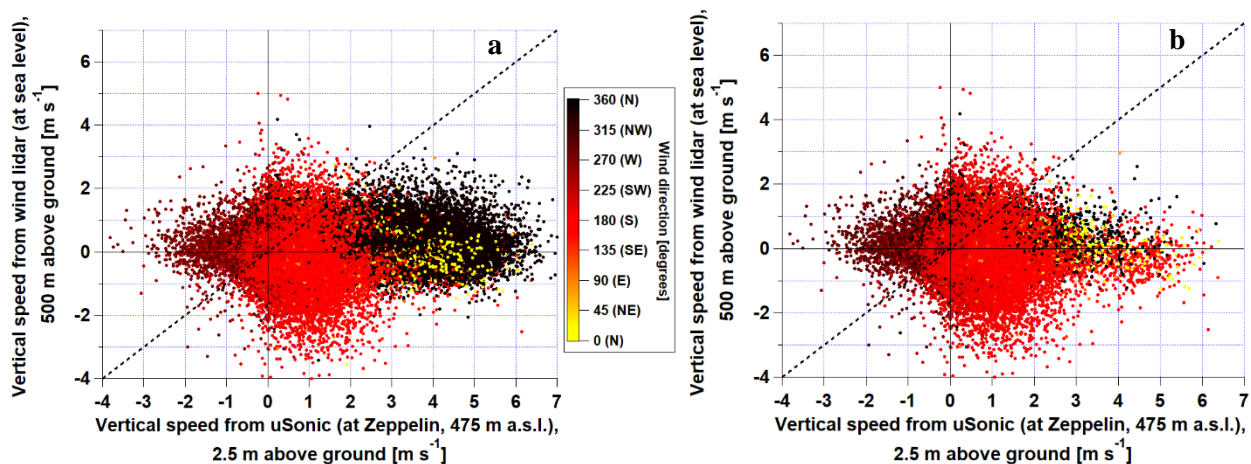

2  
3 Figure S1. Comparison of updraft velocity measured over the whole campaign by the wind LiDAR and the uSonic. Panel a)  
4 includes all data between October 1<sup>st</sup>, 2019 and May 1, 2020. The same data are shown in Panel b) but data points  
5 corresponding to wind directions between 335 and 15 degrees were removed. The location of the two instruments is separated  
6 by a horizontal distance of approximately two kilometers, and a vertical distance close to 475 m. To account for the vertical  
7 difference, 500 m-altitude wind LiDAR data are selected.

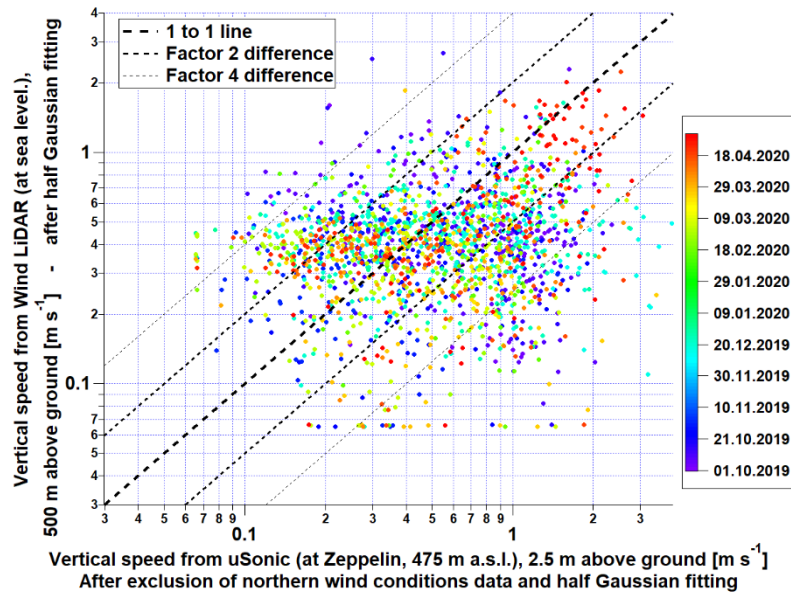

8  
9 Figure S2. Comparison between wind LiDAR and uSonic 1-hour grouped data over all simultaneous measurement periods.

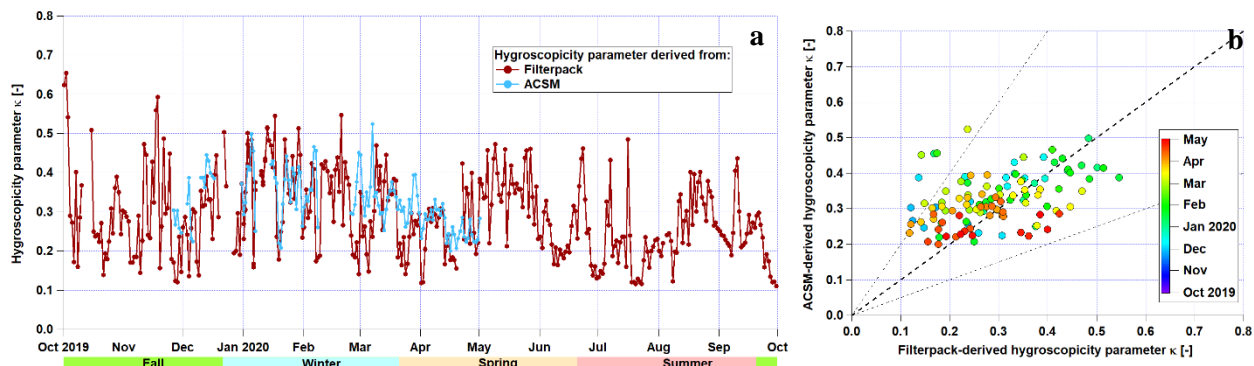

11  
12  
13  
14  
15

**Figure S3. a):** Time series of daily-averaged hygroscopicity parameter  $\kappa$  as derived from filterpack, high-volume sampler and aethalometer data (in dark red) and from ACSM ( $PM_{10}$ ) and aethalometer data (in blue). **b):** Scatterplot of daily-averaged ACSM-derived versus filterpack-derived particle hygroscopicity value  $\kappa$  over the whole campaign, coloured by date.

16  
17

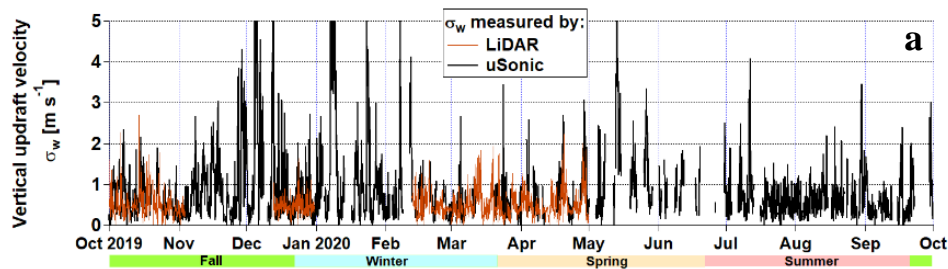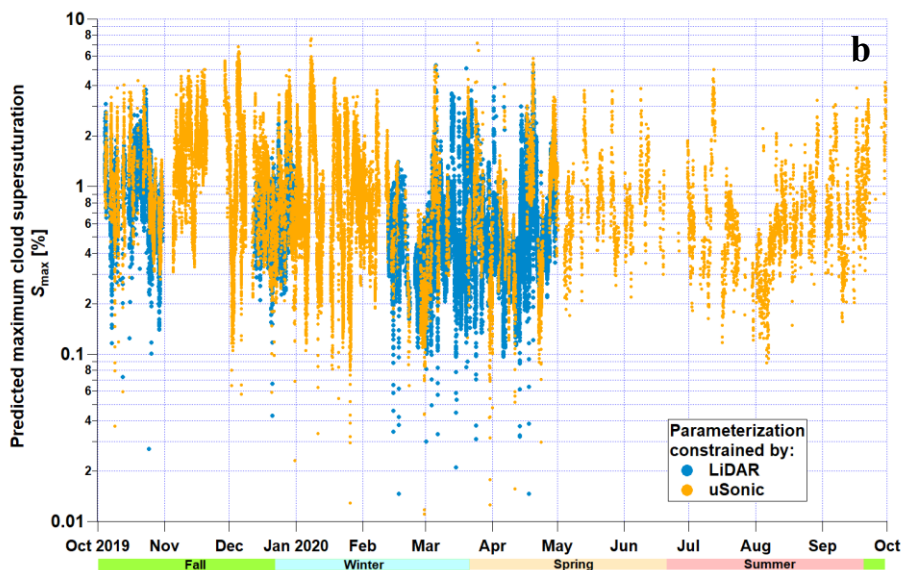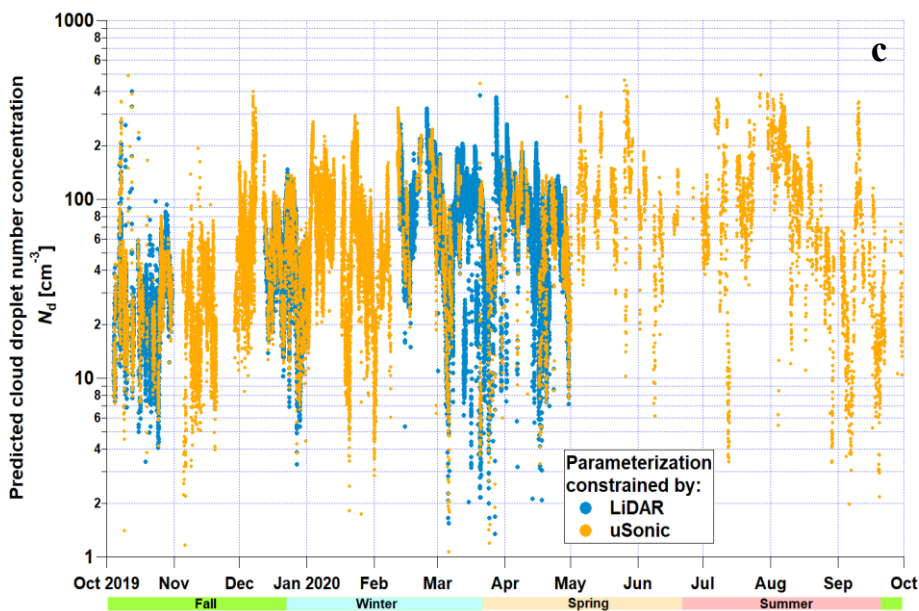

18

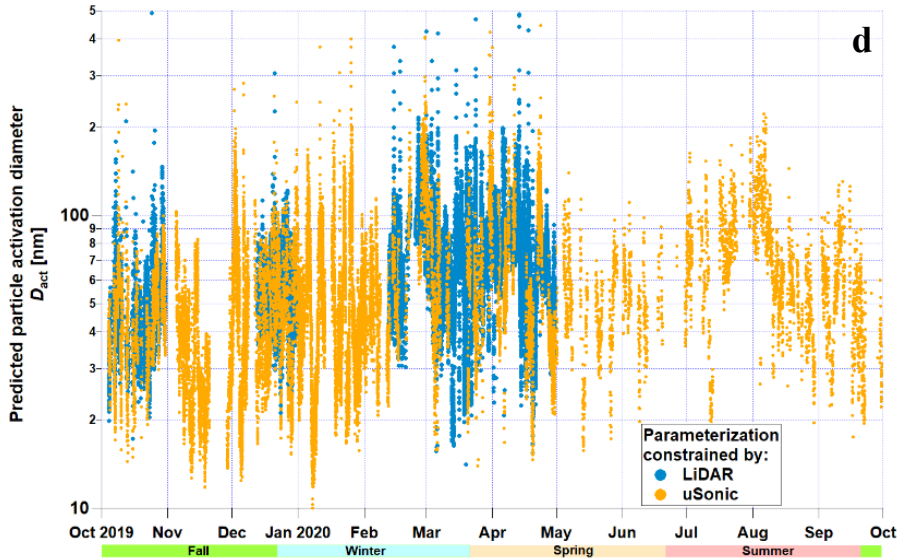

19 Figure S4. Time series of a) measured updraft velocity  $\sigma_w$ , predicted potential b) maximum cloud supersaturation  $S_{max}$ , c)  
 20 cloud droplet number concentration  $N_d$  and d) particle activation diameter  $D_{act}$  at the Zeppelin station over the whole  
 21 NASCENT campaign.  $N_d$ ,  $S_{max}$  and  $D_{act}$  are constrained by measurements of  $\sigma_w$ , whose values (after analysis as described in  
 22 Sect 3.2) are shown at the top of both panels. These results are direct outputs of the cloud droplet formation parameterization  
 23 presented in Sect. 3.2.  
 24

25  
 26

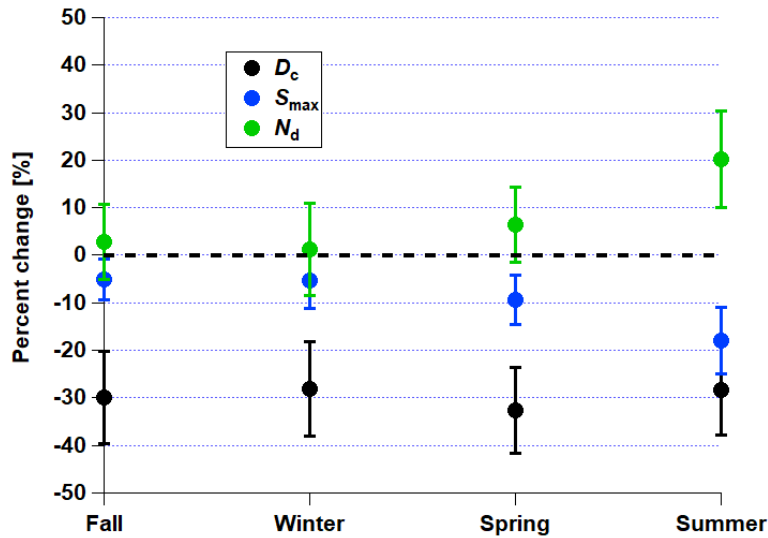

27 Figure S5. Sensitivity analysis showing the mean seasonal percent change of predicted potential maximum cloud  
 28 supersaturation  $S_{max}$ , cloud droplet number concentration  $N_d$  and particle activation diameter  $D_{act}$  assuming that half of the  
 29 aerosol mass consists of sea salt. Error bars represent the standard deviation around the seasonal mean.  
 30
